# Supplementary material
Source: publisher figshare collection journal article supplement (https://acs.figshare.com/ndownloader/files/3883108)
Supplement: Supplementary file 1 [file 3883108]

# Functionalized Graphene Nanoribbon Films as a Radiofrequency and Optically Transparent Material – Supporting Information

*Abdul-Rahman O. Raji,<sup>1</sup> Sydney Salters,<sup>1,2</sup> Errol L. G. Samuel,<sup>1</sup> Yu Zhu,<sup>1,3</sup> Vladimir Volman,<sup>4,\*</sup>  
and James M. Tour<sup>1,5,6,\*</sup>*

*<sup>1</sup>Department of Chemistry, <sup>5</sup>Department of Materials Science and NanoEngineering, <sup>6</sup>Richard E. Smalley Institute for Nanoscale Science and Technology, Rice University, 6100 Main Street, Houston, Texas 77005. <sup>2</sup>Second Baptist School, 6410 Woodway Drive, Houston, Texas 77057, <sup>3</sup>Department of Polymer Science, The University of Akron, Ohio 44325, <sup>4</sup>Lockheed Martin, MS2, Mail Stop 137-101, 199 Borton Landing Road, Moorestown, New Jersey 08057*

*\*To whom correspondence should be addressed. Email: [vlad.vlad@verizon.net](mailto:vlad.vlad@verizon.net), [tour@rice.edu](mailto:tour@rice.edu)*

**Table S1. Properties of HD-GNR films**

|                             |       |       |        |       |        |        |
|-----------------------------|-------|-------|--------|-------|--------|--------|
| $R_s$ (k $\Omega/\square$ ) | 27.7  | 26.0  | 8.1    | 5.8   | 4.3    | 1.7    |
| d (nm)                      | 42.1  | 88.8  | 138.1  | 174.1 | 202.6  | 213.0  |
| $\sigma$ (S/m)              | 857.2 | 432.5 | 1346.8 | 550.0 | 2878.4 | 3427.9 |

\* $R_s$  is the sheet resistance of the HD-GNR film. d is the thickness of the HD-GNR film.  $\sigma$  is the DC conductivity calculated based on the sheet resistance and the thickness of the HD-GNR film. Conductivity is thickness-independent for a bulk material. However, the density of HD-GNR films is proportional to the thickness; thus, increase in the DC conductivity is related to the increase in film density.

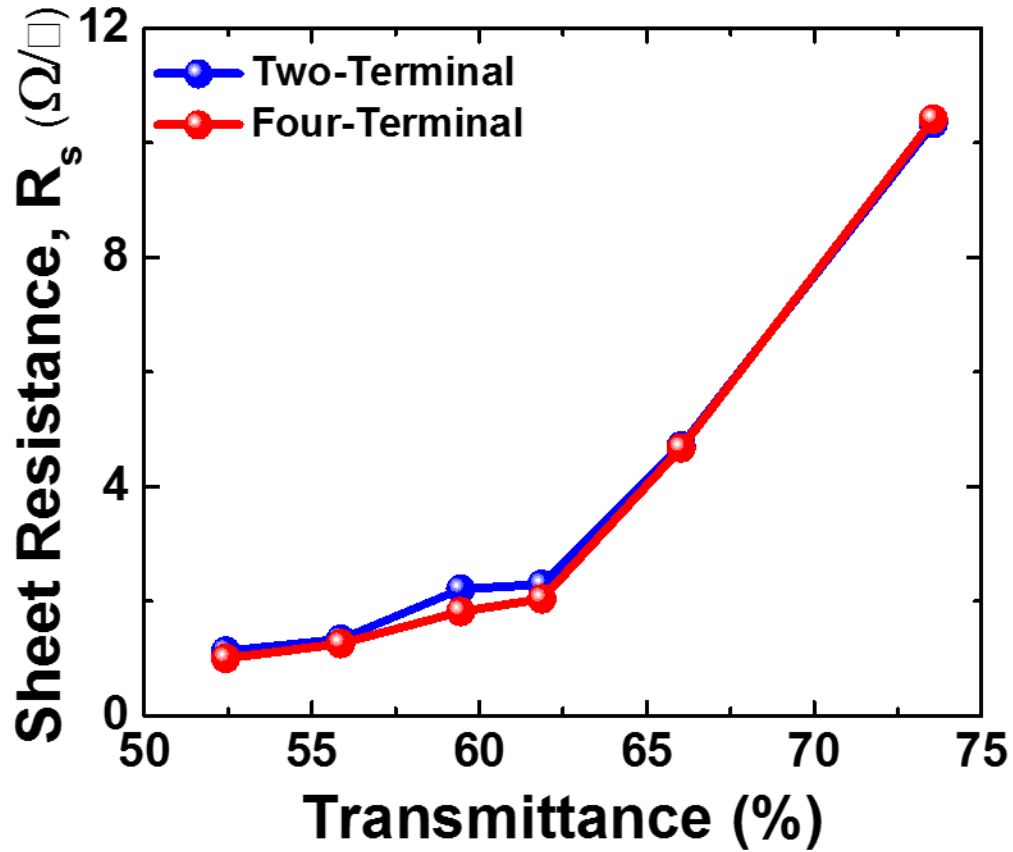

**Figure S1.** Comparison between the two-terminal and four-terminal measurements. Both methods show excellent agreement with each other. The sheet resistance with the two-terminal measurement is described in the Experimental Methods. The four-terminal measurement was carried out using Alessi four-point probe and Keithley 2010 multimeter. The four-point probe was placed directly on the HD-GNR films without any deposited metal contacts, unlike the two-terminal method. The sheet resistance was determined by  $R_s = \frac{\pi}{\ln 2} \frac{V}{I}$ . The film size was 7.62 cm  $\times$  2.54 cm, large enough to prevent the need for any correction due to finite size and edge effects that could arise from the four-terminal measurement.
